# Supplementary material for: Mucilage from Yellow Pitahaya (Selenicereus megalanthus) Fruit Peel: Extraction, Proximal Analysis, and Molecular Characterization
Source: MDPI journal article supplement (doi:10.3390/molecules28020786), 2023-01-12
Supplement: s1 [file s1]

## Supporting Information

# Mucilage from Yellow Pitahaya (*Selenicereus megalanthus*) Fruit Peel: Extraction, Proximal Analysis, and Molecular Characterization

María Carolina Otálora <sup>1,\*</sup>, Andrea Wilches-Torres <sup>1</sup> and Jovanny A. Gómez Castaño <sup>2,\*</sup>

<sup>1</sup> Grupo de Investigación en Ciencias Básicas (NÚCLEO), Facultad de Ciencias e Ingeniería, Universidad de Boyacá, Tunja, 150003, Colombia

<sup>2</sup> Grupo Química-Física Molecular y Modelamiento Computacional (QUIMOL®), Escuela de Ciencias Químicas, Universidad Pedagógica y Tecnológica de Colombia, Tunja, 150003, Colombia

\* Correspondence: marotalora@uniboyaca.edu.co (M.C.O.); jovanny.gomez@uptc.edu.co (J.A.G.C.)

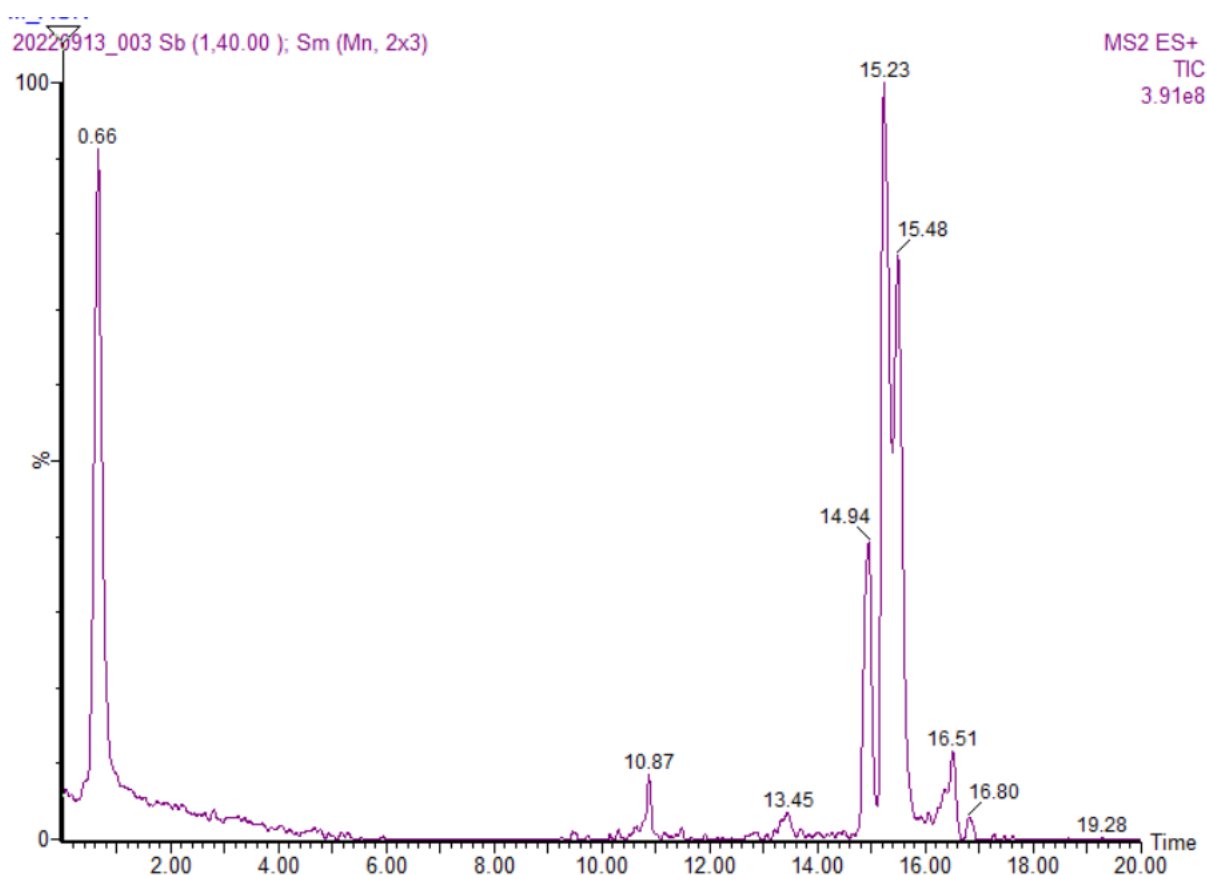

**Figure S1.** Peak chromatogram for a water:acetonitrile (50:50) solution of mucilage extracted from yellow pitahaya fruit peels obtained by UPLC-QTOF-MS/MS.

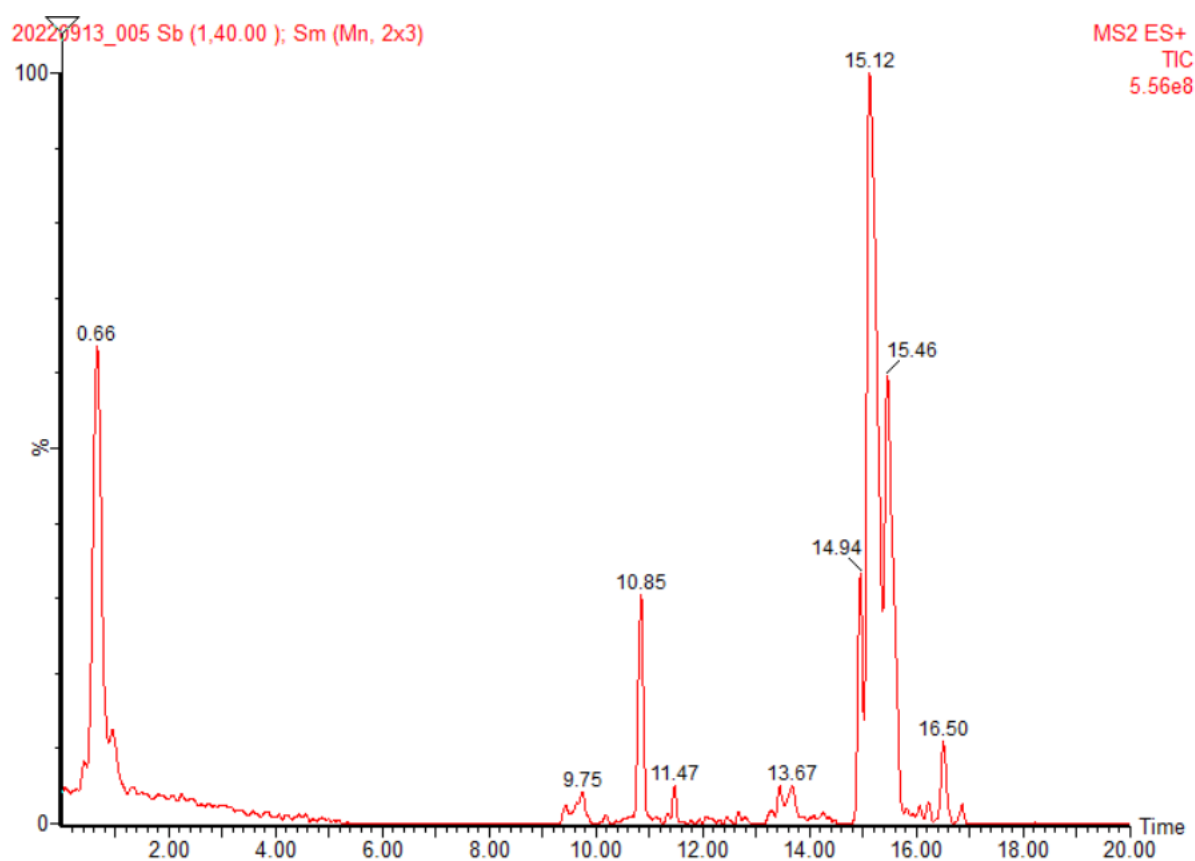

**Figure S2.** Peak chromatogram for a water:methanol (50:50) solution of mucilage extracted from yellow pitahaya fruit peels obtained by UPLC-QTOF-MS/MS.

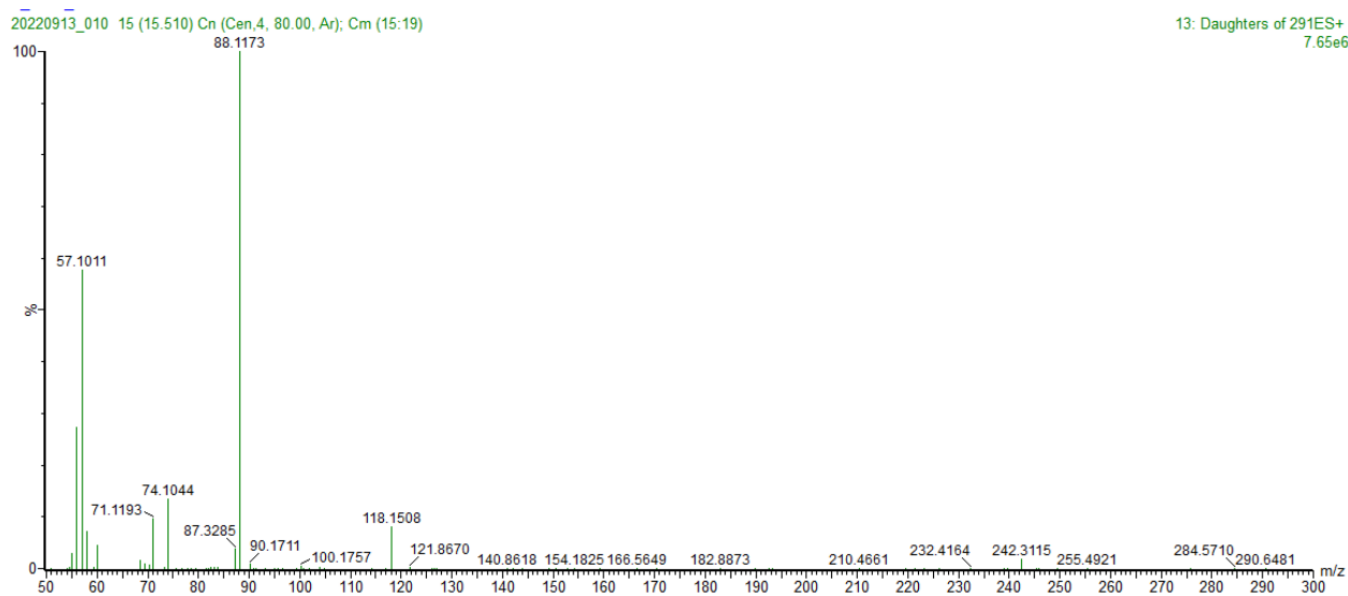

**Figure S3.** Positive ESI-MS spectrum of the component at r.t of 15.6 min of pitahaya fruit peel mucilage dissolved in water and measured at a collision offset voltage of 20 V.

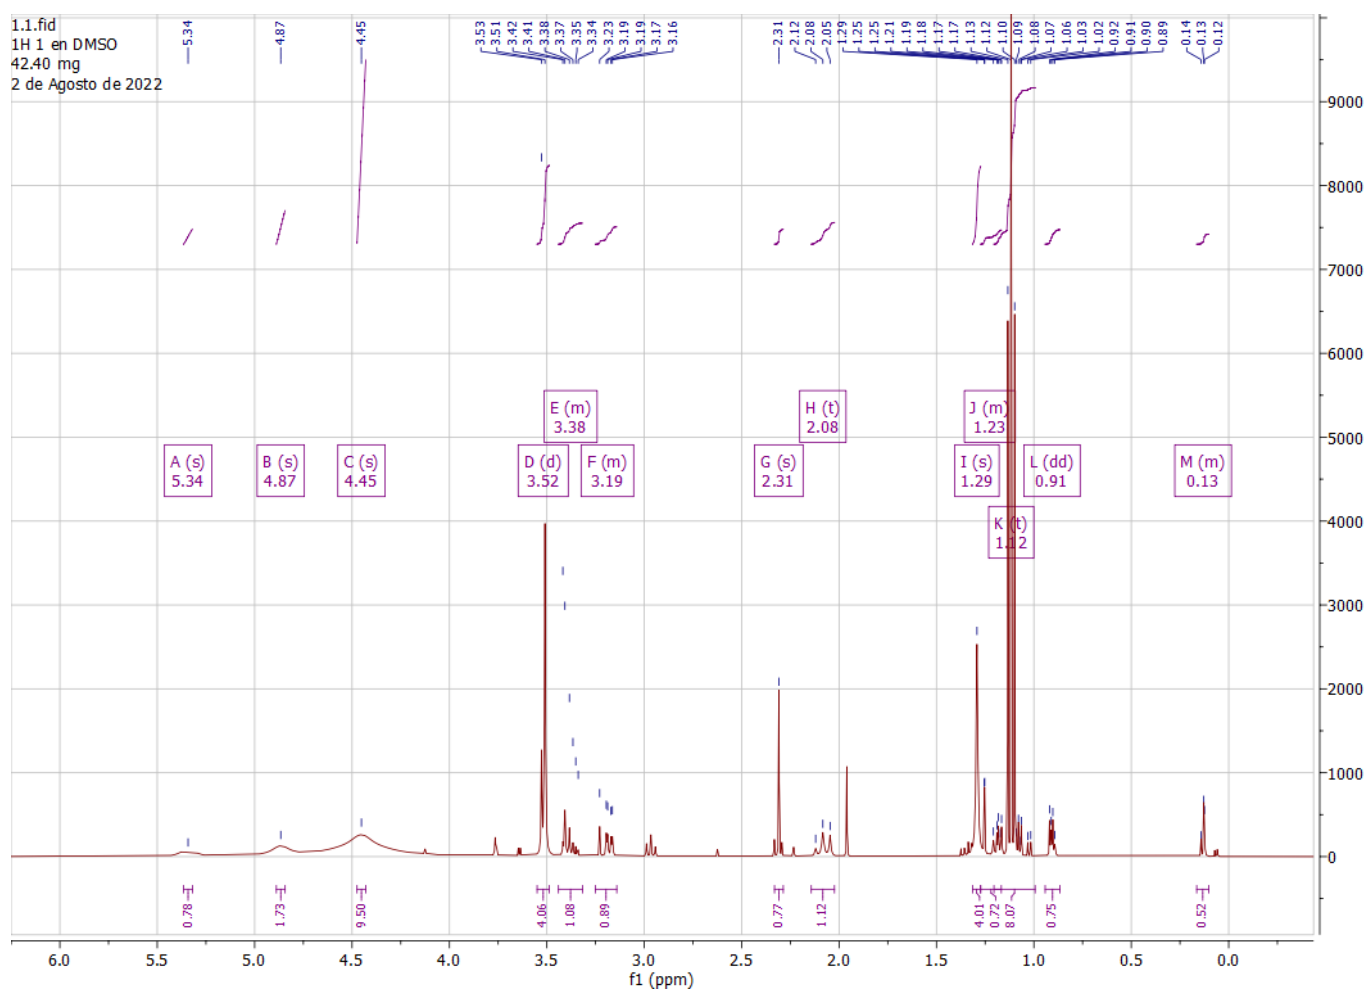

**Figure S4.**  $^1\text{H}$  NMR spectrum (in DMSO- $d_6$ ) of mucilage extracted from yellow pitahaya fruit peels.

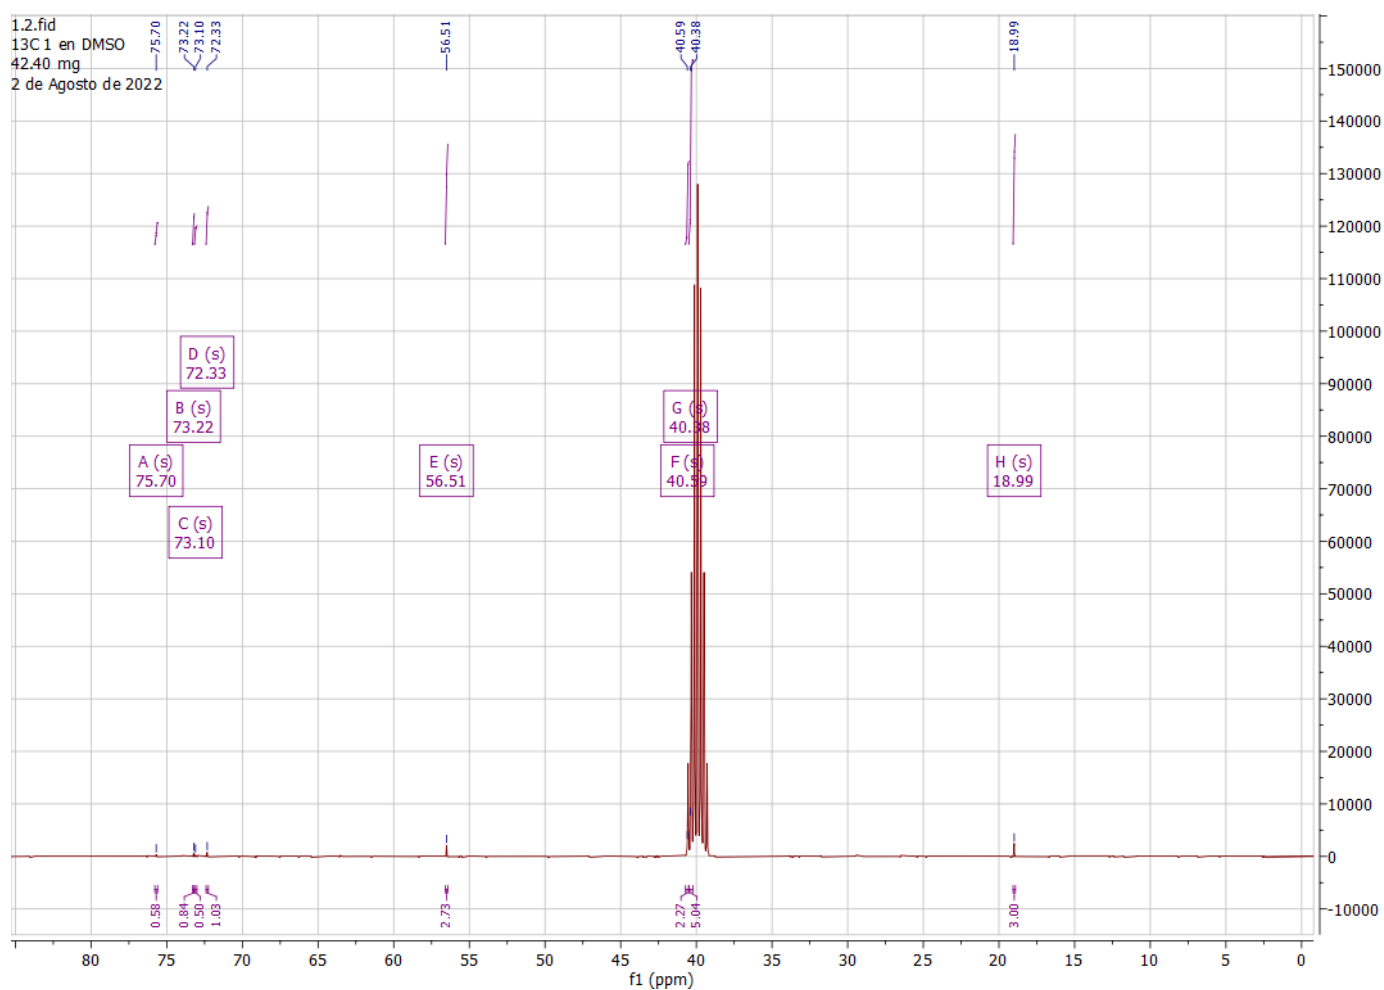

**Figure S5.**  $^{13}\text{C}$  NMR spectrum (in DMSO- $d_6$ ) of mucilage extracted from yellow pitahaya fruit peels.

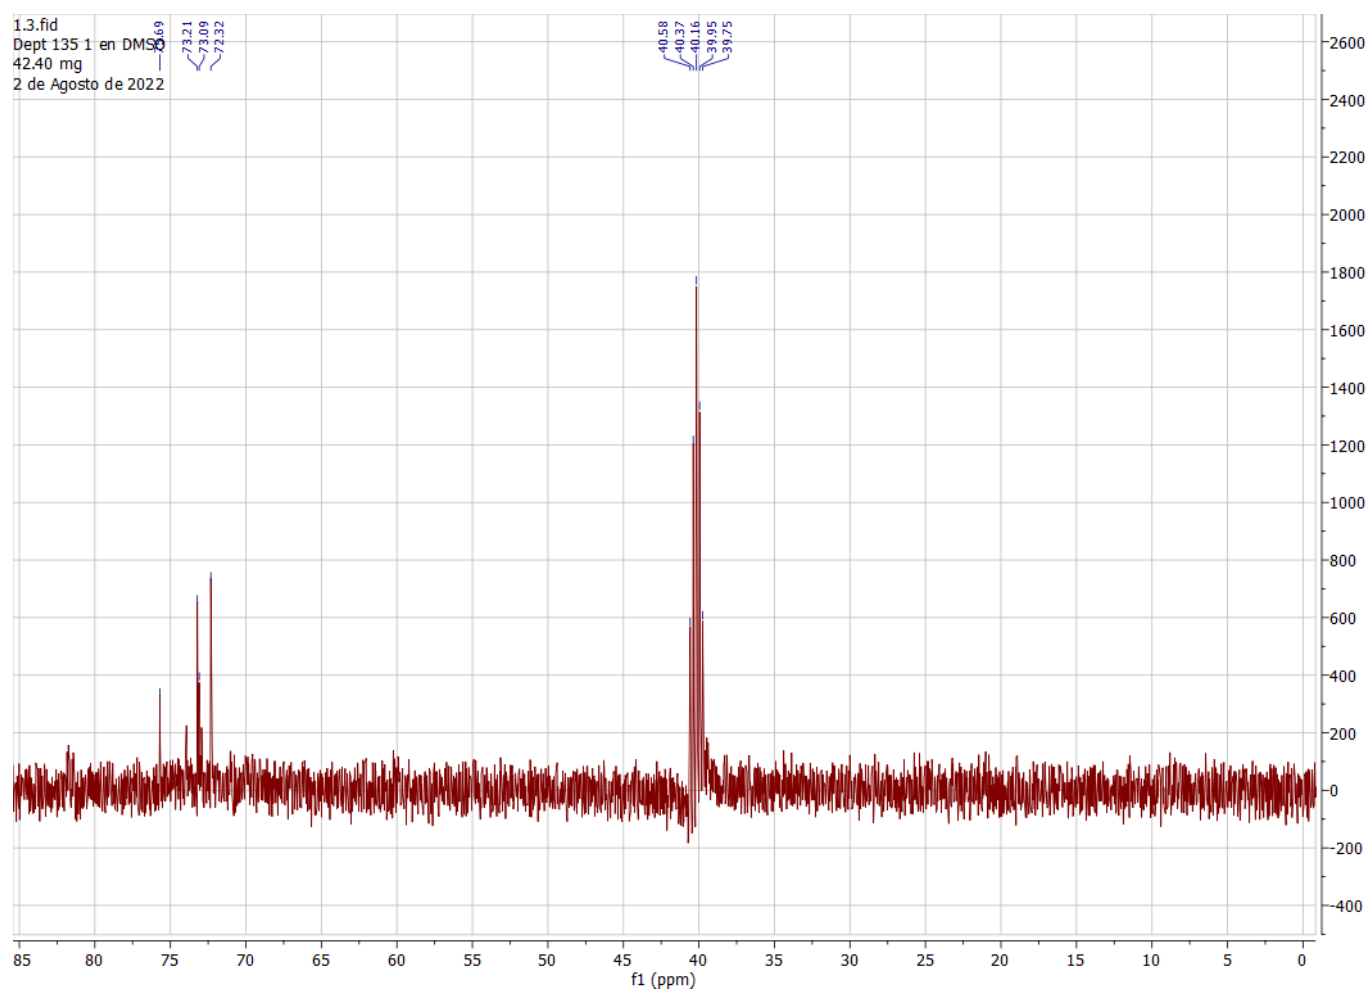

**Figure S6.** DEPT/ $^{13}\text{C}$  NMR spectrum (in DMSO- $d_6$ ) of mucilage extracted from yellow pitahaya fruit peels.

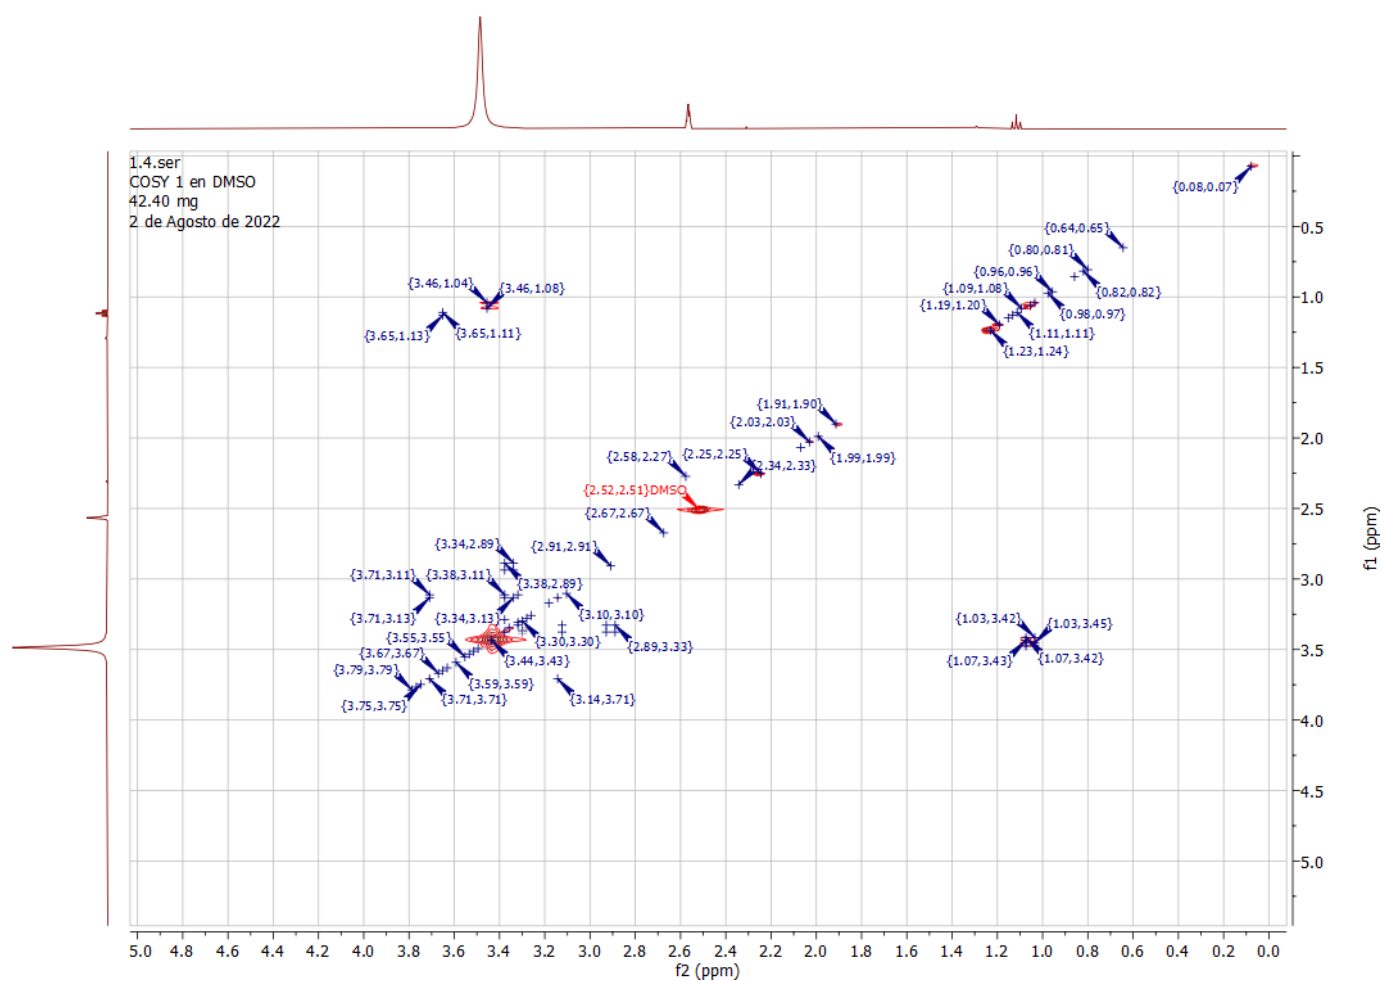

**Figure S7.**  $^1\text{H}$ - $^1\text{H}$  COSY NMR spectrum (in DMSO- $d_6$ ) of mucilage extracted from yellow pitahaya fruit peels.

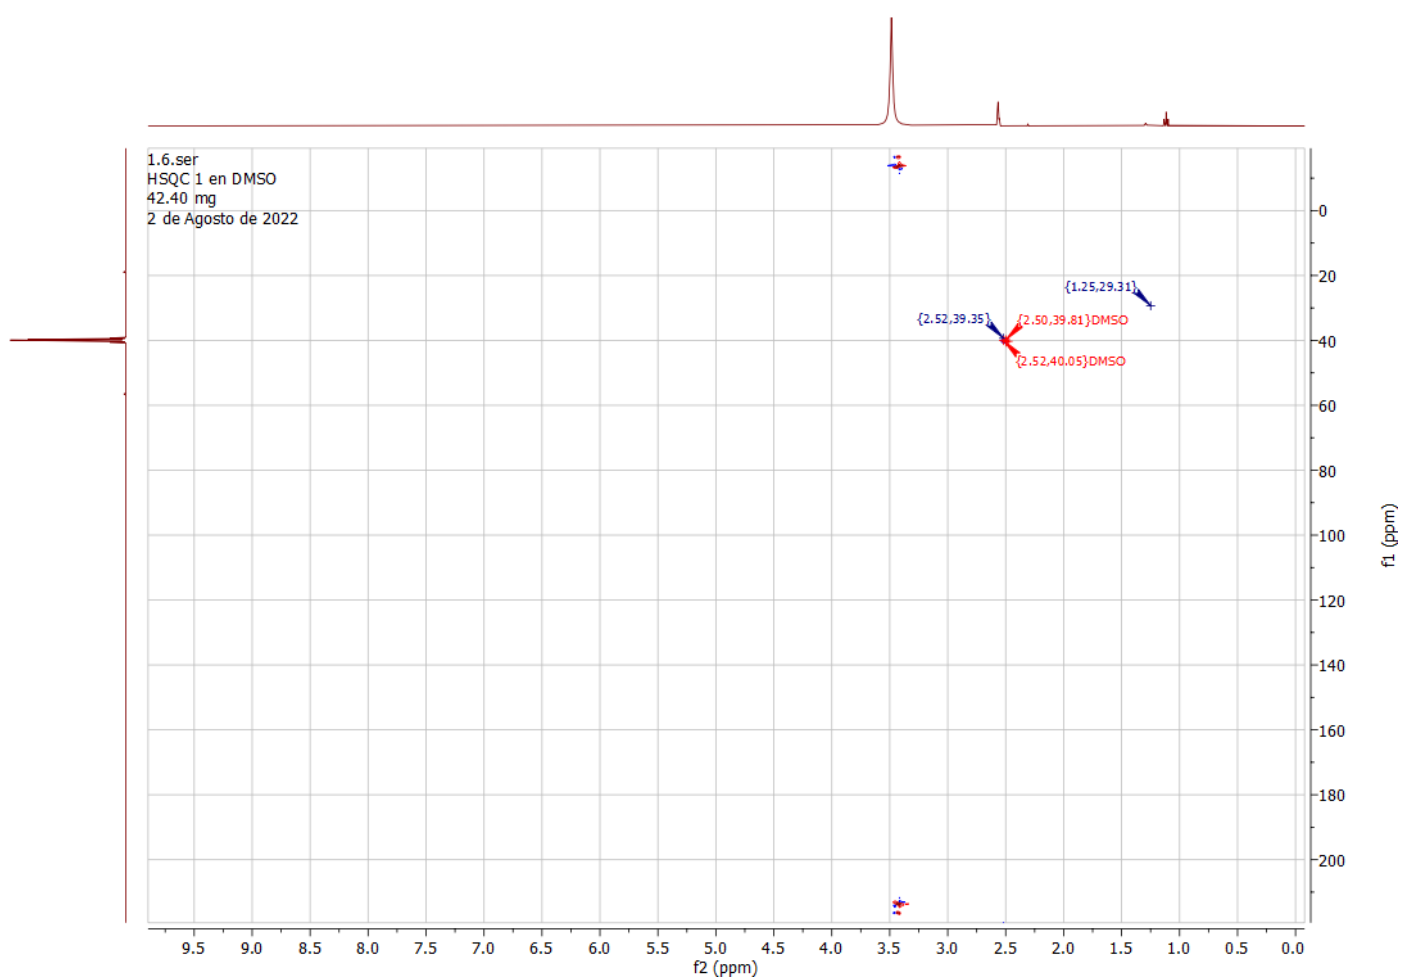

**Figure S8.** HSQC 2D-NMR spectrum (in DMSO-d<sub>6</sub>) of mucilage extracted from yellow pitahaya fruit peels.

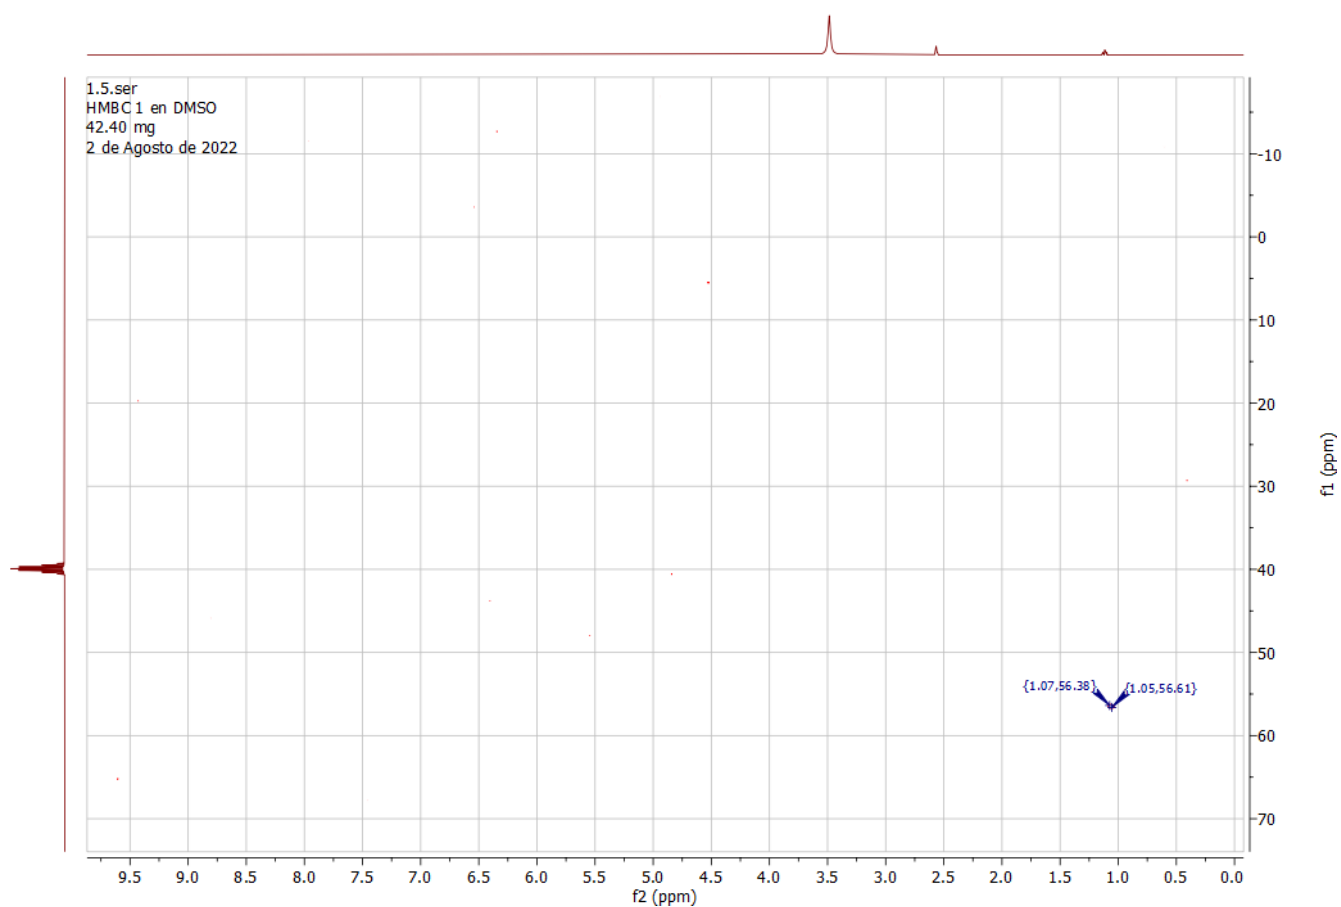

**Figure S9.** HMBC 2D-NMR spectrum (in DMSO-d<sub>6</sub>) of mucilage extracted from yellow pitahaya fruit peels.
